# Supplementary figures and images for: Case Studies in Molecular Network-Guided Marine Biodiscovery
Source: MDPI journal article supplement (doi:10.3390/md21070413), 2023-07-20

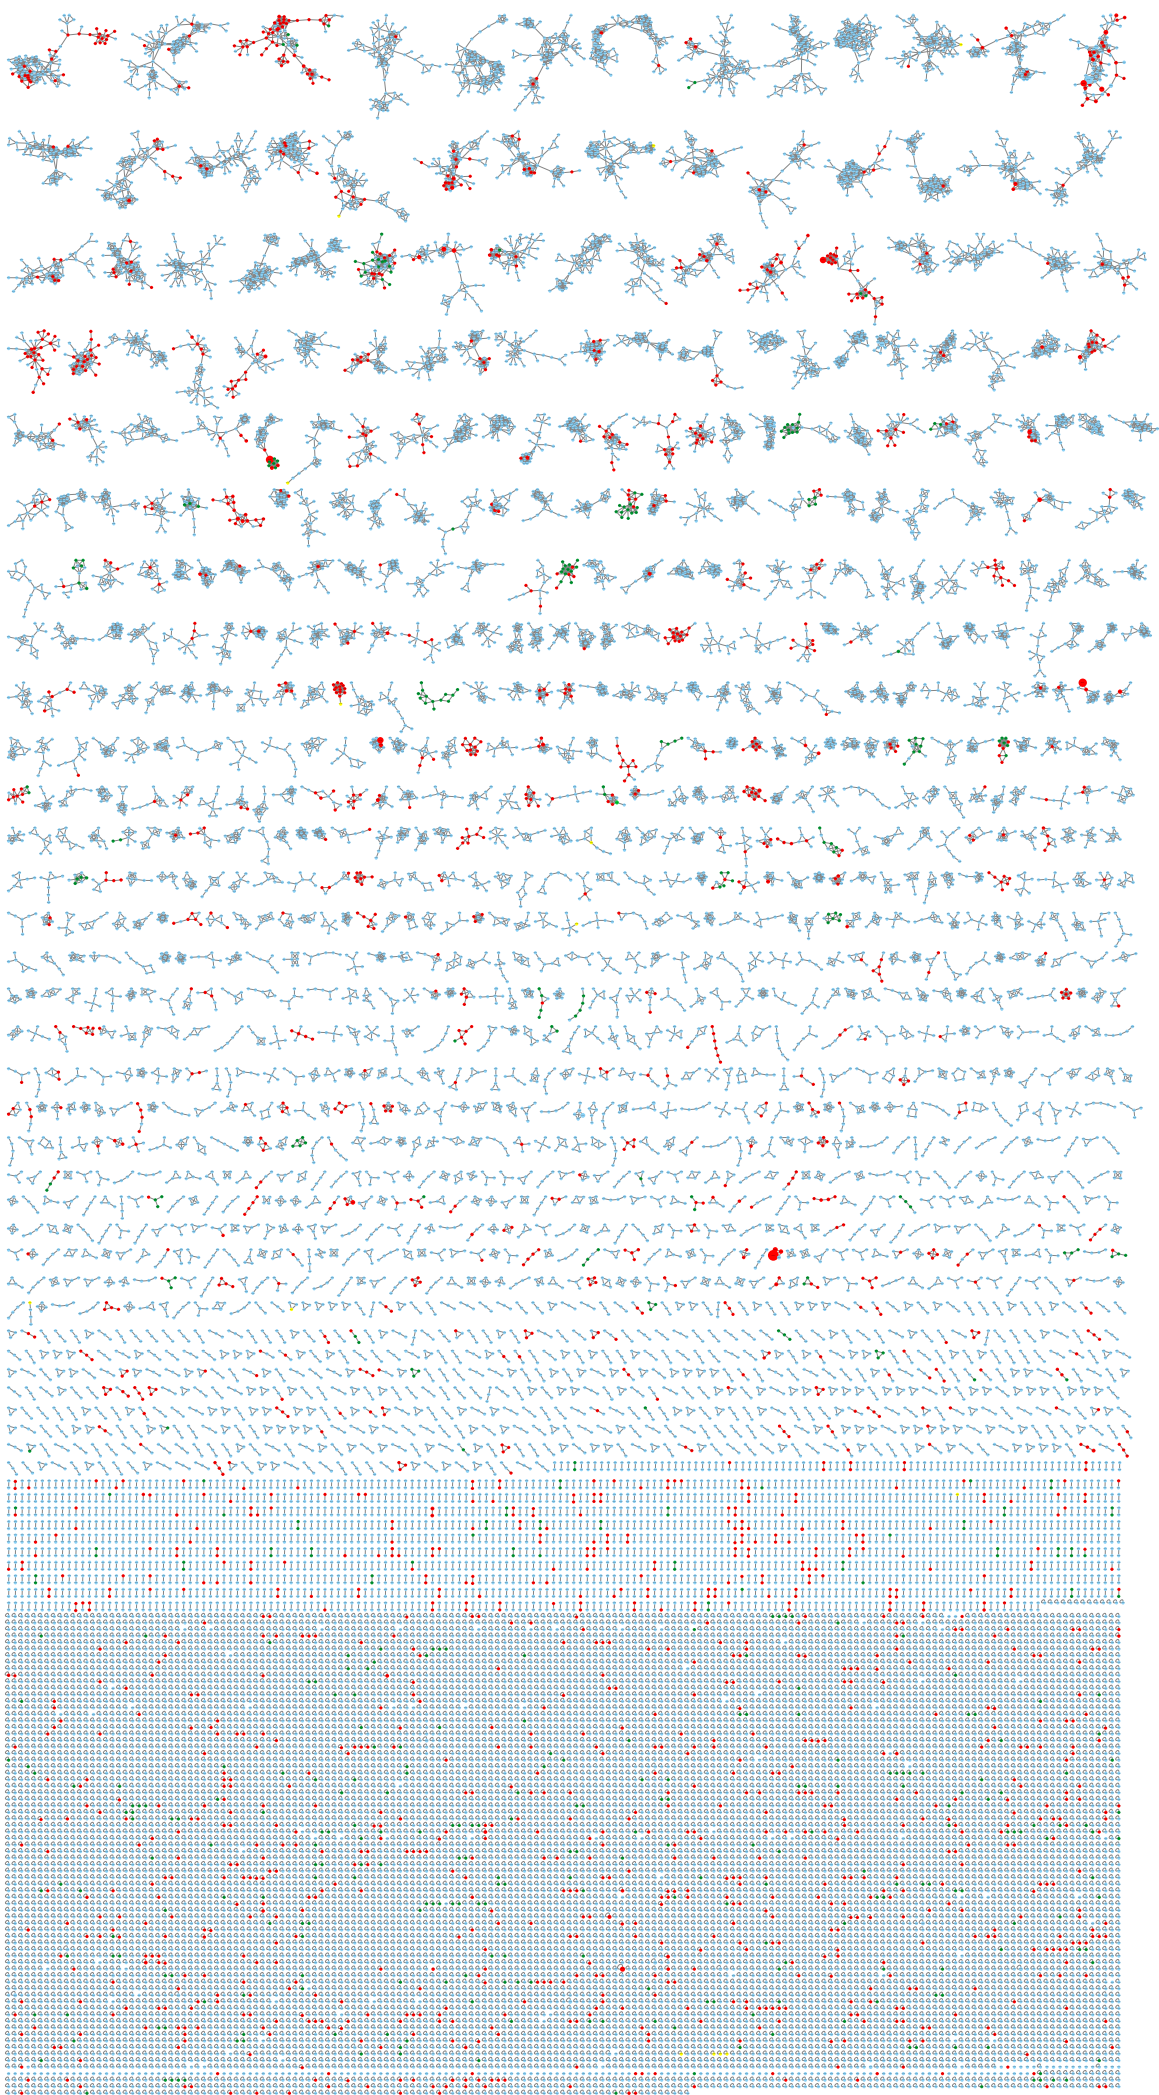

Supplement: s1 [file s1]
